# Supplementary material for: Valley-contrasting optics of interlayer excitons in Mo- and W-based bulk transition metal dichalcogenides
Source: Royal Society of Chemistry journal article supplement (doi:10.1039/c8nr03764g), 2018-01-01
Supplement: c8nr03764g1.pdf [file c8nr03764g1.pdf]

## Supplementary Information

### Valley-contrasting optics of interlayer excitons in Mo- and W-based bulk transition metal dichalcogenides

Ashish Arora<sup>1,§,\*</sup>, Thorsten Deilmann<sup>2,§</sup>, Philipp Marauhn<sup>3</sup>, Matthias Drüppel<sup>3</sup>, Robert Schneider<sup>1</sup>, Maciej R. Molas<sup>4</sup>, Diana Vaclavkova<sup>4</sup>, Steffen Michaelis de Vasconcellos<sup>1</sup>, Michael Rohlfing<sup>3</sup>, Marek Potemski<sup>4</sup>, and Rudolf Bratschitsch<sup>1</sup>

<sup>1</sup>*Institute of Physics and Center for Nanotechnology, University of Münster, Wilhelm-Klemm-Straße 10, 48149 Münster, Germany.*

<sup>2</sup>*Center for Atomic-Scale Materials Design (CAMD), Department of Physics, Technical University of Denmark, DK-2800 Kongens Lyngby, Denmark.*

<sup>3</sup>*Institute of Solid State Theory, Wilhelm-Klemm-Straße 10, University of Münster, 48149 Münster, Germany.*

<sup>4</sup>*Laboratoire National des Champs Magnétiques Intenses, CNRS-UGA-UPS-INSA-EMFL, 25 rue des Martyrs, 38042 Grenoble, France.*

\*Correspondence to: [arora@uni-muenster.de](mailto:arora@uni-muenster.de)

**Experiment.** Bulk MoSe<sub>2</sub> and WSe<sub>2</sub> crystals are mechanically exfoliated<sup>1</sup> onto 500 μm thick c-cut sapphire substrates. The thickness of the two TMDC crystals as obtained by atomic force microscopy (AFM) is 30 ± 0.5 nm. The samples are mounted on a x-y-z piezo nanopositioner assembly, which is fixed on the front end of an optical fiber-based low-temperature insert (T = 4.2 K) installed in the 50 mm diameter bore of a resistive magnet. The magnet creates a magnetic field of up to 29 T at the sample position. Broadband light from a tungsten halogen lamp is routed inside the insert using a 50 μm diameter optical fiber, which is focused on the sample using an aspheric lens of 3.1 mm focal length and 0.68 numerical aperture. The full width at half maximum (FWHM) diameter of the focus is 10 μm. The reflected light from the sample is circularly polarized with a quarter wave plate and a polarizer assembly, before being collected using another 50 μm diameter optical fiber. The reflected light is dispersed using a monochromator (focal length of 0.3 m) and detected using a liquid nitrogen-cooled Silicon charged coupled device (CCD) detector. The measurements are performed by setting the polarizer and quarter wave plate for a fixed circular polarization of detection, while reversing the magnetic field direction to obtain spectra for both helicities due to time reversal symmetry. The reflectance contrast spectrum  $C(\lambda)$  as a function of the wavelength  $\lambda$  is defined as  $C(\lambda) = [R(\lambda) - R_0(\lambda)]/[R(\lambda) + R_0(\lambda)]$ , where  $R(\lambda)$  and  $R_0(\lambda)$  are the reflectance spectra of the TMDC crystal on the substrate and the bare substrate, respectively. The  $C(\lambda)$  spectral line shapes in Fig. 2 are modeled using a transfer matrix method-based approach, where complex Lorentzians represent the excitonic contribution to the dielectric function as

$$\epsilon(E) = (n_b + ik_b)^2 + \frac{A}{E_0^2 - E^2 - i\gamma E} \quad (1)$$

Here,  $n_b + ik_b$  is the background refractive index of the TMDC without excitonic effects.  $A$ ,  $E_0$ , and  $\gamma$  are the excitonic oscillator strength, transition energy, and the FWHM linewidth, respectively.

**Theory.** We have performed *ab initio* calculations of the four 2H phase TMDC bulk crystals employing a hierarchy of methods (see also Ref. 2). For all calculations, the experimental lattice constants were used<sup>3</sup>. We optimize the internal structure until forces are below  $10^{-4}R_y/a_B$  using a  $21 \times 21 \times 3$  k-mesh within the local density approximation. A basis of localized Gaussian orbitals (s, p, d, and  $s^*$ , in total 30 per atom) is used alongside norm-conserving pseudopotentials which include the spin-orbit coupling<sup>4-6</sup>. To improve the description of the electronic properties many-body perturbation theory calculations within the *GdW* approximation<sup>7</sup> are performed with a plane wave cutoff of 2.5 Ry and k-grid of at least  $21 \times 21 \times 4$  points. The optical properties are calculated by solving the Bethe-Salpeter equation within the Tamm-Dancoff approximation<sup>8,9</sup> employing a grid of  $21 \times 21 \times 6$  points. The RMS radius of the excitons  $\sqrt{\langle r_x^2 \rangle}$  is evaluated on a  $30 \times 30 \times 4$  k-mesh (Ref. 2), using which excitons with radii less than 3 nm can be described fairly reliably.

#### References:

- 1 A. Castellanos-Gomez, M. Buscema, R. Molenaar, V. Singh, L. Janssen, H. S. J. van der Zant and G. a Steele, *2D Mater.*, 2014, **1**, 11002.
- 2 A. Arora, M. Drüppel, R. Schmidt, T. Deilmann, R. Schneider, M. R. Molas, P. Marauhn, S. Michaelis de Vasconcellos, M. Potemski, M. Rohlfing and R. Bratschitsch, *Nat. Commun.*, 2017, **8**, 639.
- 3 W. S. Yun, S. W. Han, S. C. Hong, I. G. Kim and J. D. Lee, *Phys. Rev. B*, 2012, **85**, 33305.
- 4 J. Wieferink, P. Krüger and J. Pollmann, *Phys. Rev. B*, 2006, **74**, 205311.
- 5 D. R. Hamann, *Phys. Rev. B*, 1989, **40**, 2980–2987.
- 6 L. A. Hemstreet, C. Y. Fong and J. S. Nelson, *Phys. Rev. B*, 1993, **47**, 4238–4243.
- 7 M. Rohlfing, *Phys. Rev. B*, 2010, **82**, 205127.
- 8 M. Rohlfing and S. G. Louie, *Phys. Rev. B*, 2000, **62**, 4927–4944.
- 9 S. Hirata and M. Head-Gordon, *Chem. Phys. Lett.*, 1999, **314**, 291–299.

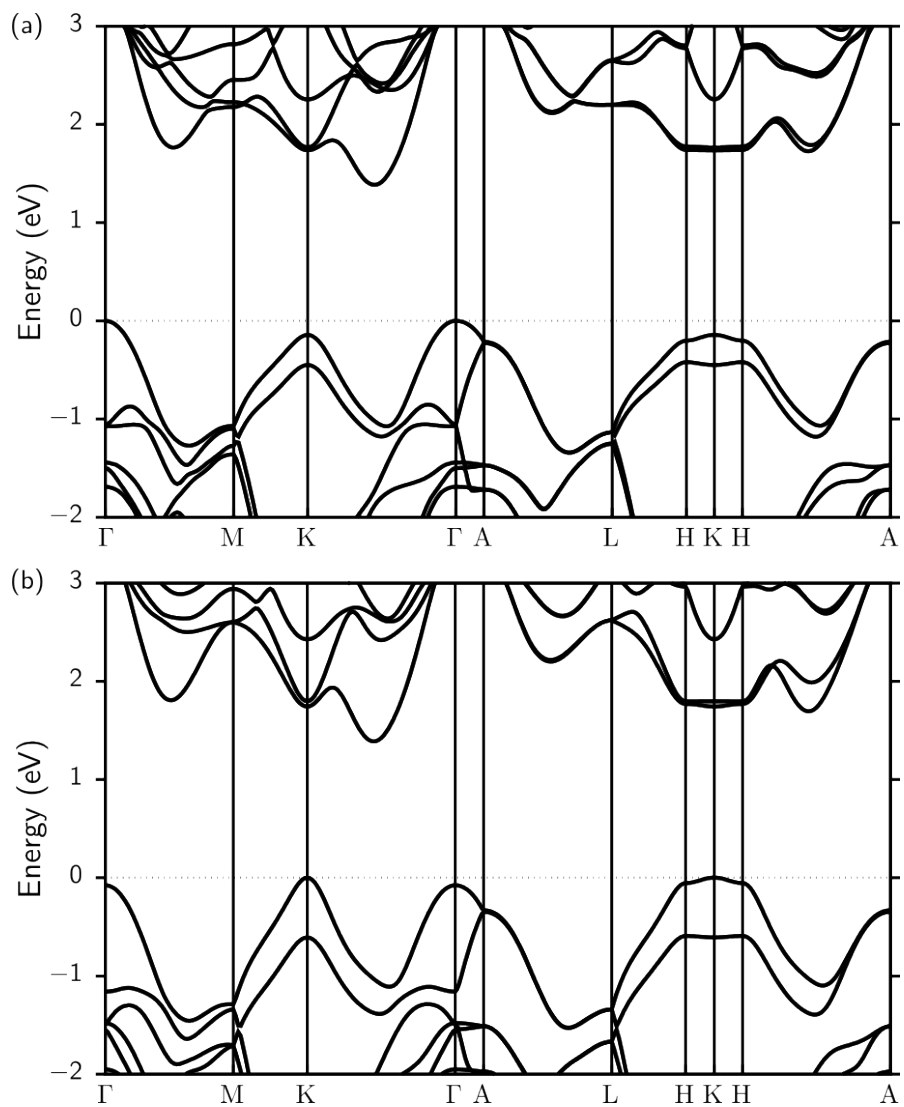

**Fig. S1.** Band structures of 2H bulk (a) MoSe<sub>2</sub> and (b) WSe<sub>2</sub> in the *GdW* approximation. We employ a plane wave cutoff of 2.5 Ry and a k grid of  $21 \times 21 \times 4$  points.

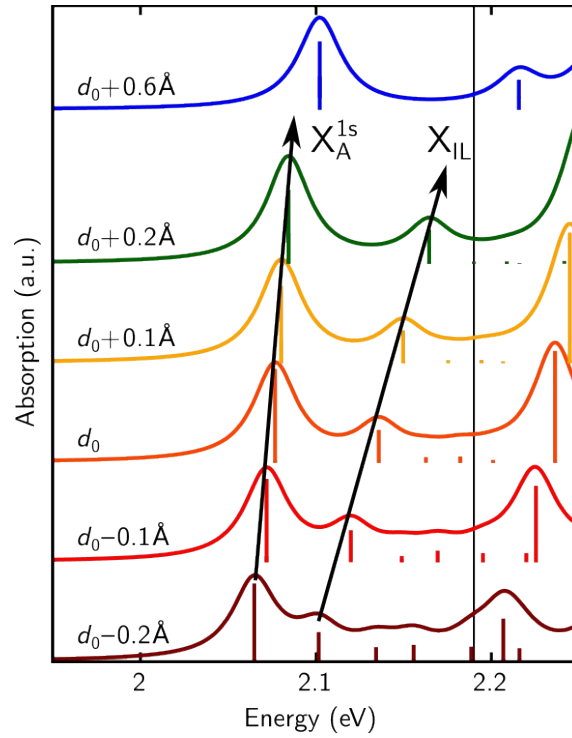

**Fig. S2.** Calculated absorption spectra of bulk  $\text{MoS}_2$  for different interlayer distance  $d$ . Six different spectra (vertically shifted for clarity) are shown for distances  $d = d_0 - 0.2 \text{ \AA} \dots d_0 + 0.6 \text{ \AA}$ . The first two bright peaks are  $X_A^{1s}$  and  $X_{IL}$ . Their energetic separation increases almost linearly with increasing the interlayer distance, leading to a tunable intralayer-interlayer splitting.
